# Supplementary material for: Quantum dot light-emitting diodes using a graphene oxide/PEDOT:PSS bilayer as hole injection layer
Source: Royal Society of Chemistry journal article supplement (doi:10.1039/c7ra07948f), 2017-01-01
Supplement: c7ra07948f1.pdf [file c7ra07948f1.pdf]

**Electronic Supplementary Information for**

**Quantum dot light-emitting diodes using graphene  
oxide/PEDOT:PSS bilayer as hole injection layer**

Dae-Ho Song,<sup>a,b</sup> Suk-Ho Song,<sup>a</sup> Tian-Zi Shen,<sup>a</sup> Jun-Seo Lee,<sup>a</sup>

Won-Hyuk Park,<sup>a</sup> Sang-Soo Kim\*<sup>a</sup> and Jang-Kun Song\*<sup>a</sup>

*<sup>a</sup>School of Electronic and Electrical Engineering, Sungkyunkwan University, Suwon 440-746, South Korea*

*<sup>b</sup>Display Laboratory, Samsung Institute of Technology, Youngin 446-711, South Korea*

*Co-corresponding Authors: [sskim0703@skku.edu](mailto:sskim0703@skku.edu), [jk.song@skku.edu](mailto:jk.song@skku.edu)*

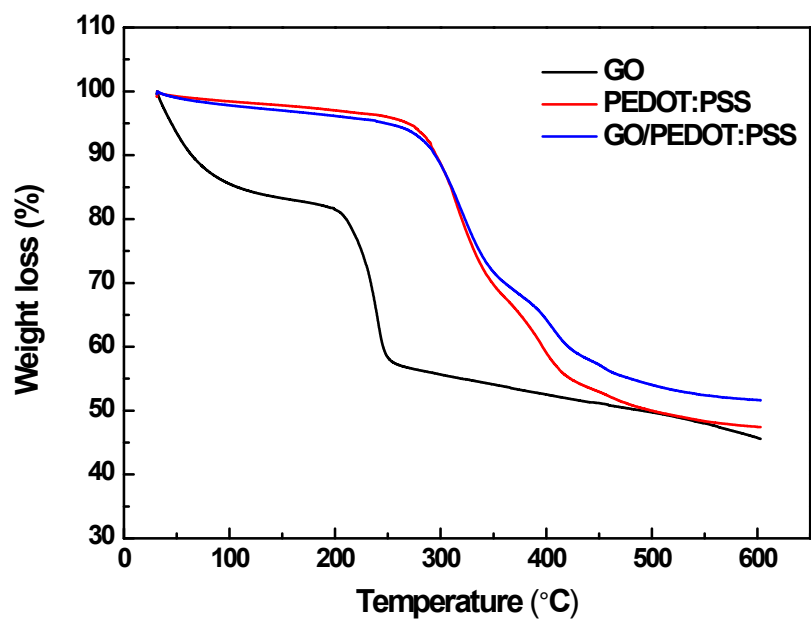

**ESI Fig. S1.** Thermogravimetry analyzer (TGA) for GO, PEDOT:PSS, and GO/PEDOT:PSS bilayers. TGA analysis was performed using EXSTAR 6000 TG/DTA 6300 (Seiko, Japan) in a N<sub>2</sub> atmosphere at the speed of 10 °C per minute.

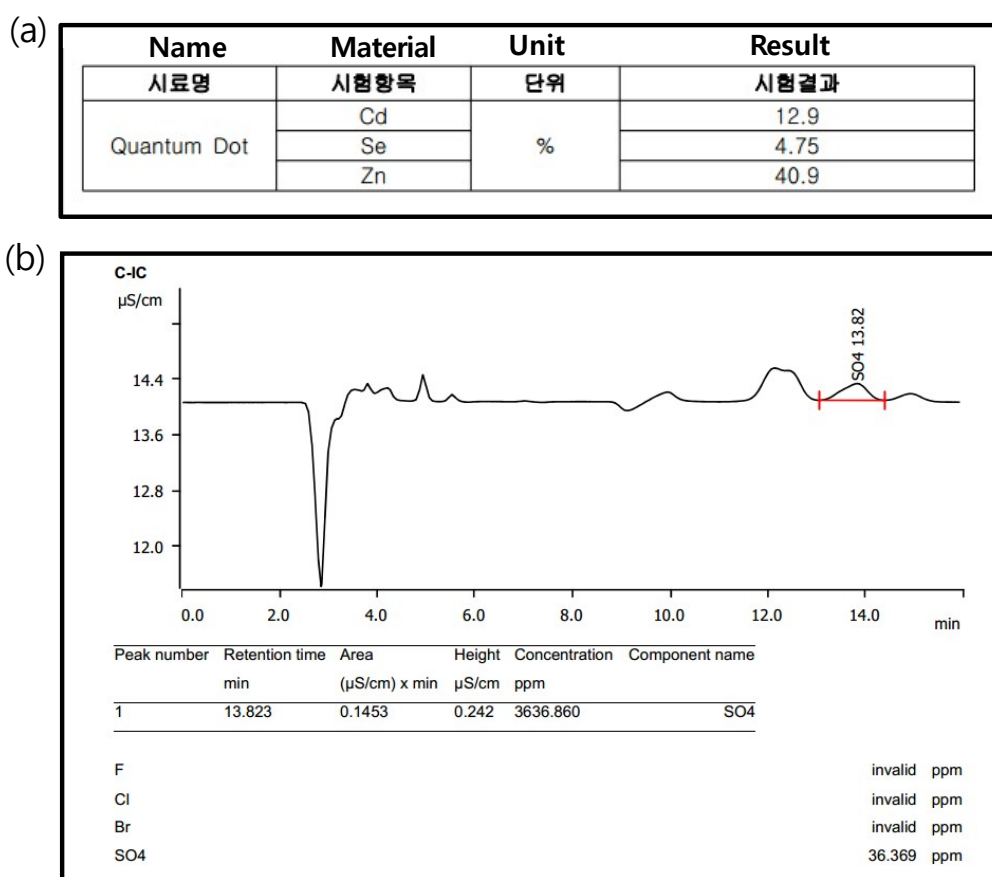

**ESI Fig. S2.** The analysis reports for (a) inductively coupled plasma-mass spectroscopy (ICP-MS) analysis, and (b) combustion ion chromatography (CIC) analysis of CdSe@ZnS QD. The analyses were performed in Cooperative Center for Research Facilities (CCRF) in Sungkyunkwan University, and the images shown above were taken from the official analysis reports. In the ICP-MS analysis, Cd, Se, and Zn were detected and in the CIC analysis, Sulphur was detected.
